# Supplementary material
Source: Springer Nature journal article supplement (https://www.springermedizin.de/resource/supplementary/12935_2009_208_MOESM5_ESM.pdf/9541376)

**Day 6**

**MCF-10A**

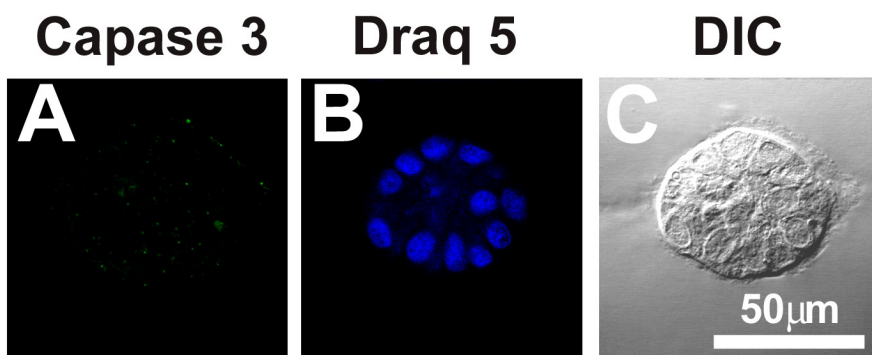

**MCF-10AT**

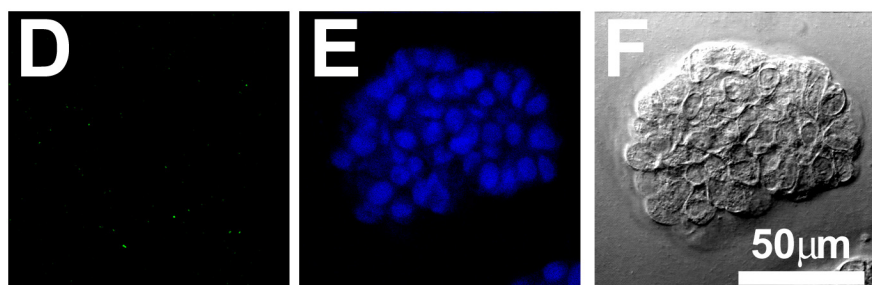

**MCF-10CA1a**

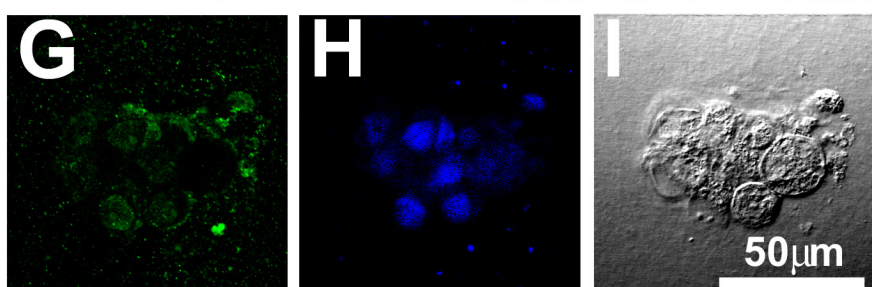

**Day 12**

**MCF-10A**

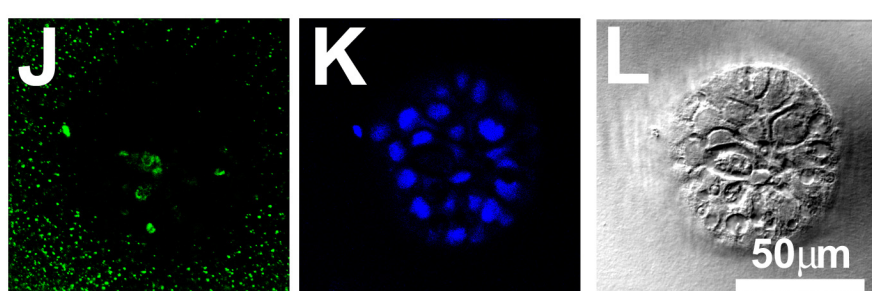

**MCF-10AT**

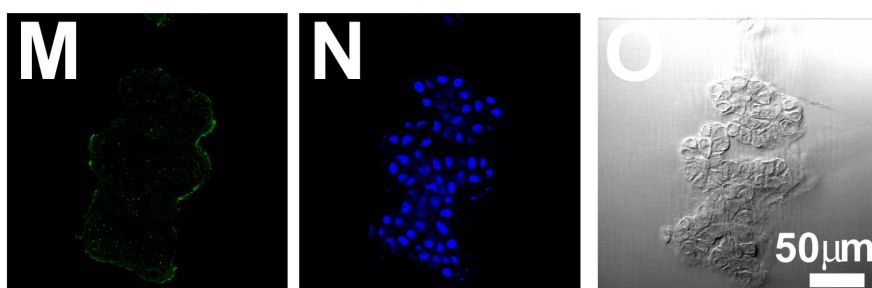

**MCF-10CA1a**

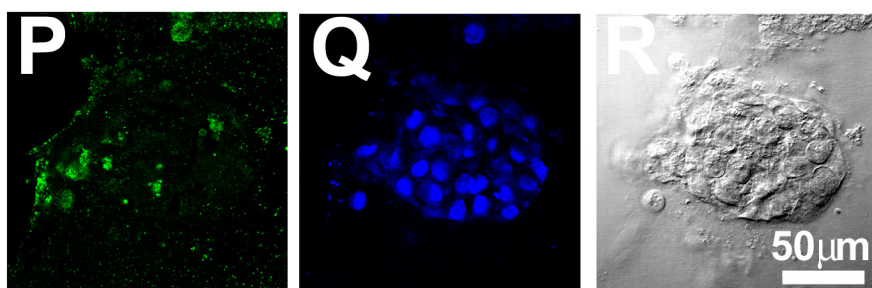

**Day 20**

**MCF-10A**

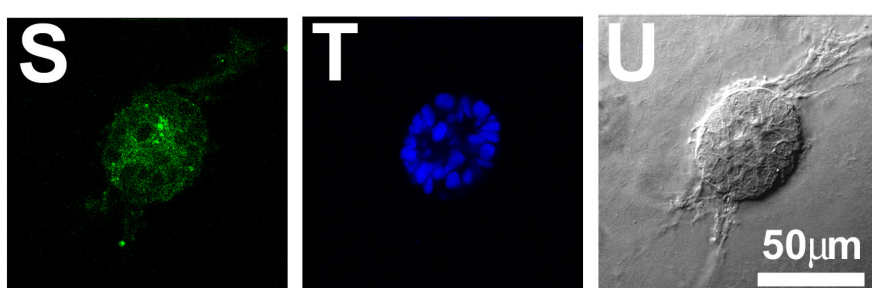

**MCF-10AT**

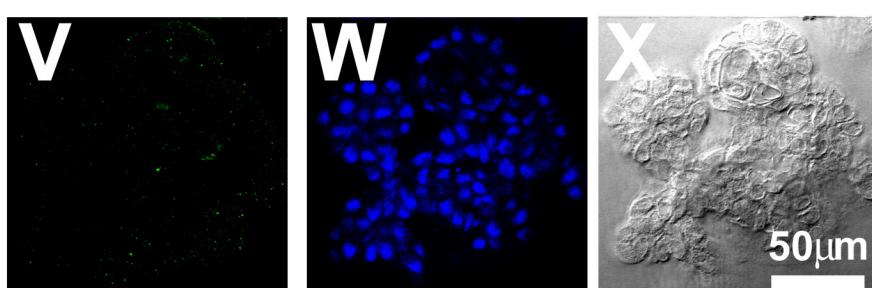

**MCF-10CA1a**

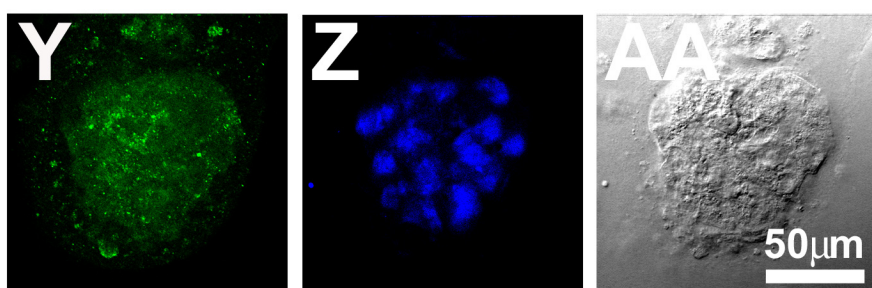

Supplement: MOESM5 [file 9541376]
